# Supplementary material
Source: publisher figshare collection journal article supplement (https://asha.figshare.com/ndownloader/files/36251076)
Supplement: Supplementary file 1 [file 36251076]

## **Supplemental Material S1. Sample item.**

### **Target Form**

Possessive 's

### **Target Response**

“Cowboy’s boots”

### **Programmed Acceptable Target Responses**

"cowboys"

"boys"

"kids"

### **ASR-Transcribed Child Response**

Alternative #1: cowboys boots

Alternative #2: cowboys

Alternative #3: cowboys colts

Alternative #4: cowboys notes

### **ASR Score**

1 - Correct (i.e., at least one acceptable response across the four transcription alternatives)
